# Supplementary material for: Cooperativity between H-bonds and tetrel bonds. Transformation of a noncovalent C⋯N tetrel bond to a covalent bond
Source: Royal Society of Chemistry journal article supplement (doi:10.1039/d3cp04430k), 2023-01-01
Supplement: d3cp04430k1.pdf [file d3cp04430k1.pdf]

## Cooperativity between H-Bonds and Tetrel Bonds.

### Transformation of a Noncovalent C $\cdots$ N Tetrel Bond to a Covalent Bond

Xin Wang, Qingzhong Li, Steve Scheiner

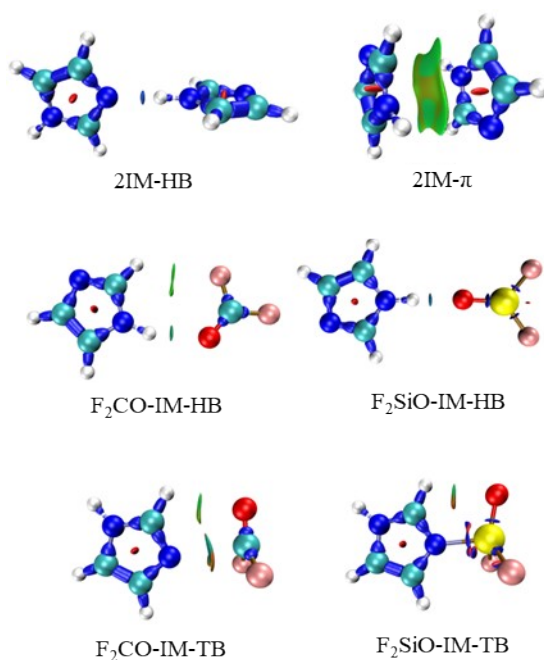

Fig. S1 NCI diagram of binary complexes. Blue, red, and green regions denote strong attractive, strong repulsion, and weak attractive interactions, respectively

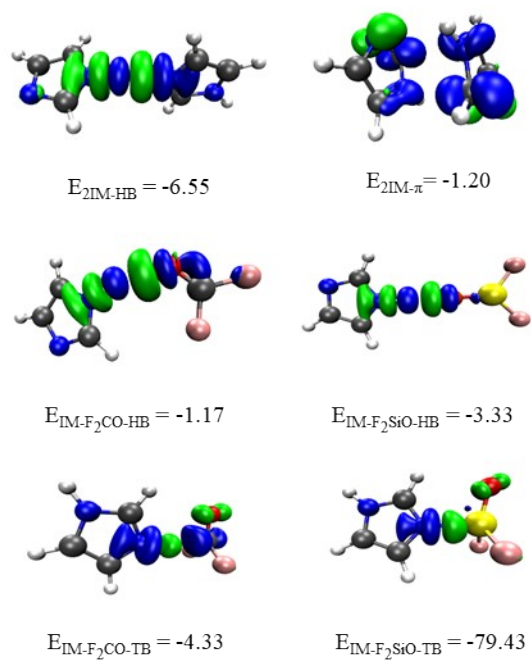

Fig. S2 NOCV density contour map and orbital energy ( $E$ , kJ/mol) of binary complexes. Blue is giving electrons, while green is taking electrons.

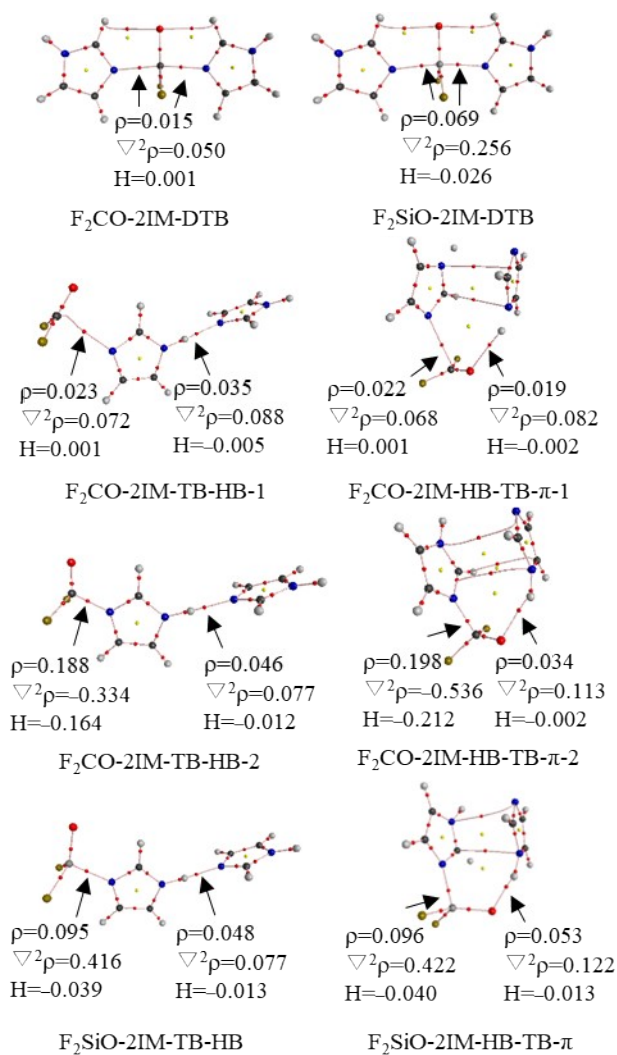

Fig.S3 AIM diagrams of the ternary complexes. Yellow and red dots indicate the locations of ring and bond critical points, respectively. all in a.u.

Table S1 The binding distances of tetrel bond ( $R_{TB}$ ) and hydrogen bond ( $R_{HB}$ ) in the ternary complexes as well as their difference ( $\Delta R$ ) with respect to the binary analogues, all in Å

|                                       | $R_{TB}$ | $\Delta R_{TB}$ | $R_{HB}$ | $\Delta R_{HB}$ |
|---------------------------------------|----------|-----------------|----------|-----------------|
| F <sub>2</sub> CO-2IM-DTB             | 2.731    | 0.166           |          |                 |
| F <sub>2</sub> SiO-2IM-DTB            | 1.997    | 0.124           |          |                 |
| F <sub>2</sub> CO-2IM-TB-HB-1         | 2.501    | -0.064          | 1.868    | -0.024          |
| F <sub>2</sub> CO-2IM-TB-HB-2         | 1.616    | -0.949          | 1.773    | -0.119          |
| F <sub>2</sub> SiO-2IM-TB-HB          | 1.859    | -0.014          | 1.754    | -0.138          |
| F <sub>2</sub> CO-2IM-HB-TB- $\pi$ -1 | 2.518    | -0.047          | 2.012    | -0.086          |
| F <sub>2</sub> CO-2IM-HB-TB- $\pi$ -2 | 1.605    | -0.960          | 1.826    | -0.272          |
| F <sub>2</sub> SiO-2IM-HB-TB- $\pi$   | 1.857    | -0.016          | 1.641    | -0.228          |

COORDINATES OF MONOMERS AND COMPLEXES

F<sub>2</sub>CO

|   |             |             |            |
|---|-------------|-------------|------------|
| C | 0.00000000  | 0.14348000  | 0.00000000 |
| O | -0.00007100 | 1.32118700  | 0.00000000 |
| F | -1.06171400 | -0.63508800 | 0.00000000 |
| F | 1.06177700  | -0.63495300 | 0.00000000 |

F<sub>2</sub>SiO

|    |             |             |            |
|----|-------------|-------------|------------|
| Si | 0.00000000  | 0.13283600  | 0.00000000 |
| O  | -0.00037900 | 1.65618700  | 0.00000000 |
| F  | -1.24395800 | -0.83962100 | 0.00000000 |
| F  | 1.24429500  | -0.83917900 | 0.00000000 |

IM

|   |             |             |             |
|---|-------------|-------------|-------------|
| C | 0.55701900  | 1.01516800  | -0.00006800 |
| C | 1.14865000  | -0.22833300 | -0.00005100 |
| C | -0.96282200 | -0.58583300 | 0.00007800  |
| N | -0.79166700 | 0.76591000  | 0.00003800  |
| H | -1.52342400 | 1.45634500  | 0.00013200  |
| H | 0.95850500  | 2.01264100  | -0.00013500 |
| H | 2.20040200  | -0.45713400 | -0.00010400 |
| H | -1.93627200 | -1.04591200 | 0.00014800  |
| N | 0.19791100  | -1.21904500 | -0.00001000 |

2IM- $\pi$

|   |             |             |             |
|---|-------------|-------------|-------------|
| C | -1.27096600 | 0.92792900  | 0.76359500  |
| C | -2.37990700 | -0.22520100 | -0.66157300 |
| C | -1.77819900 | -1.13569200 | 0.18098400  |
| N | -1.08192600 | -0.37919100 | 1.08501500  |
| H | -0.43858200 | -0.72966200 | 1.77792400  |
| H | -0.81761600 | 1.72960600  | 1.32078700  |
| H | -3.03014000 | -0.42712800 | -1.49594000 |
| H | -1.78460300 | -2.21061500 | 0.21631000  |
| C | 1.27048800  | -0.92755000 | -0.76387800 |
| C | 2.38038100  | 0.22454000  | 0.66138900  |
| C | 1.77856700  | 1.13562900  | -0.18045100 |
| N | 1.08166900  | 0.37978400  | -1.08455600 |
| H | 0.43801700  | 0.73077700  | -1.77692100 |
| H | 0.81663600  | -1.72880600 | -1.32126100 |
| H | 3.03105000  | 0.42585900  | 1.49556400  |
| H | 1.78528200  | 2.21056800  | -0.21524700 |
| N | 2.05858000  | -1.06018800 | 0.29319900  |
| N | -2.05864000 | 1.05980500  | -0.29388800 |

## 2IM-HB

|   |             |             |             |
|---|-------------|-------------|-------------|
| C | -2.13283500 | -0.86454100 | 0.55069300  |
| C | -2.29029800 | 0.96106300  | -0.57670700 |
| C | -3.57987700 | 0.54159400  | -0.34655100 |
| N | -3.45634700 | -0.62015600 | 0.37145500  |
| H | -4.21252200 | -1.19362600 | 0.70720500  |
| H | -1.76065100 | -1.72145500 | 1.08575800  |
| H | -1.96130100 | 1.83642100  | -1.10923200 |
| H | -4.53567400 | 0.95076000  | -0.61970100 |
| C | 2.30912900  | -0.58621100 | -0.90927400 |
| C | 3.62822100  | 0.30436600  | 0.51867900  |
| C | 2.34833600  | 0.63575700  | 0.91340300  |
| N | 1.51950600  | 0.05851300  | -0.01068600 |
| H | 0.49414400  | 0.09678600  | -0.02092700 |
| H | 1.90409400  | -1.12684900 | -1.74829600 |
| H | 4.55716400  | 0.57468200  | 0.99173900  |
| H | 1.97106900  | 1.21186600  | 1.73995800  |
| N | 3.59835400  | -0.45950600 | -0.62088300 |
| N | -1.39756700 | 0.08104200  | -0.01530800 |

F<sub>2</sub>CO-IM-HB

|   |             |             |             |
|---|-------------|-------------|-------------|
| C | 1.57750900  | 0.87246200  | -0.00025600 |
| C | 3.45287200  | -0.15837500 | 0.00044400  |
| C | 2.48193400  | -1.13641100 | 0.00022800  |
| N | 1.29114800  | -0.45837900 | -0.00011000 |
| H | 0.36503000  | -0.85834200 | -0.00029400 |
| H | 0.81015000  | 1.62817400  | -0.00057400 |
| H | 4.52133100  | -0.29012400 | 0.00077700  |
| H | 2.53166500  | -2.21064000 | 0.00034200  |
| N | 2.88331900  | 1.09054300  | 0.00012900  |
| F | -2.17606700 | 1.16379800  | -0.00030200 |
| F | -3.79653600 | -0.20943800 | 0.00037200  |
| O | -1.72728900 | -1.01125500 | -0.00033600 |
| C | -2.49193600 | -0.10991100 | -0.00013900 |

F<sub>2</sub>SiO-IM-HB

|   |            |             |             |
|---|------------|-------------|-------------|
| C | 2.63247500 | 1.07680600  | -0.00075900 |
| C | 3.97713100 | -0.58668200 | 0.00039700  |
| C | 2.70557400 | -1.12002100 | 0.00077500  |
| N | 1.86081600 | -0.04235900 | 0.00003600  |
| H | 0.84630600 | -0.07083000 | 0.00007500  |
| H | 2.21112100 | 2.06781800  | -0.00145000 |
| H | 4.91517800 | -1.11524600 | 0.00075800  |
| H | 2.34298500 | -2.13254800 | 0.00148300  |

|    |             |             |             |
|----|-------------|-------------|-------------|
| N  | 3.92556600  | 0.78475500  | -0.00054400 |
| F  | -3.43579300 | 1.28481800  | 0.00096300  |
| F  | -3.55669800 | -1.21240400 | -0.00095100 |
| O  | -1.02225000 | -0.08498500 | -0.00000300 |
| Si | -2.54292300 | -0.00988800 | 0.00000900  |

F<sub>2</sub>CO-IM-TB

|   |             |             |             |
|---|-------------|-------------|-------------|
| C | -1.17063000 | 0.93110100  | 0.00005600  |
| C | -1.59253200 | -1.17525200 | 0.00005300  |
| C | -2.81518700 | -0.54308400 | -0.00009500 |
| N | -2.52337700 | 0.79701900  | -0.00000700 |
| H | -3.19045600 | 1.55040400  | -0.00005100 |
| H | -0.66943300 | 1.88428200  | 0.00009400  |
| H | -1.39420400 | -2.23305100 | 0.00010400  |
| H | -3.82464500 | -0.91303200 | -0.00022500 |
| N | -0.57706600 | -0.25160700 | 0.00010700  |
| F | 2.08813200  | -0.60894400 | -1.06341700 |
| F | 2.08813400  | -0.60881400 | 1.06345400  |
| O | 1.86614200  | 1.33174900  | -0.00010300 |
| C | 1.95606600  | 0.15379200  | -0.00003400 |

F<sub>2</sub>SiO-IM-TB

|    |             |             |             |
|----|-------------|-------------|-------------|
| C  | -1.27457100 | 1.04526900  | -0.00010900 |
| C  | -1.34342600 | -1.14575800 | -0.00019000 |
| C  | -2.63945300 | -0.70165700 | -0.00000200 |
| N  | -2.56467000 | 0.67044100  | -0.00008200 |
| H  | -3.34584600 | 1.30665700  | -0.00008500 |
| H  | -0.87682700 | 2.04673000  | -0.00012700 |
| H  | -0.95349400 | -2.14735700 | -0.00028300 |
| H  | -3.57530600 | -1.22916100 | 0.00005500  |
| N  | -0.51859100 | -0.04851100 | -0.00001000 |
| F  | 1.67716100  | -0.81914100 | -1.24653000 |
| F  | 1.67707700  | -0.81932900 | 1.24655900  |
| O  | 1.60729300  | 1.65794000  | 0.00019900  |
| Si | 1.34518000  | 0.14037100  | 0.00007500  |

F<sub>2</sub>CO-2IM-DTB

|   |            |            |             |
|---|------------|------------|-------------|
| C | 0.00000000 | 3.06745800 | 0.97047500  |
| C | 0.00000000 | 3.91619200 | -1.00029300 |
| C | 0.00000000 | 4.98287100 | -0.12964000 |
| N | 0.00000000 | 4.41991700 | 1.12121100  |
| H | 0.00000000 | 4.91682200 | 1.99600900  |
| H | 0.00000000 | 2.37969300 | 1.79901700  |
| H | 0.00000000 | 3.94158800 | -2.07634700 |

|   |             |             |             |
|---|-------------|-------------|-------------|
| H | 0.00000000  | 6.04718800  | -0.28231400 |
| C | 0.00000000  | -3.06745800 | 0.97047500  |
| C | 0.00000000  | -3.91619200 | -1.00029300 |
| C | 0.00000000  | -4.98287100 | -0.12964000 |
| N | 0.00000000  | -4.41991700 | 1.12121100  |
| H | 0.00000000  | -4.91682200 | 1.99600900  |
| H | 0.00000000  | -2.37969300 | 1.79901700  |
| H | 0.00000000  | -3.94158800 | -2.07634700 |
| H | 0.00000000  | -6.04718800 | -0.28231400 |
| N | 0.00000000  | -2.73043800 | -0.30880500 |
| N | 0.00000000  | 2.73043800  | -0.30880500 |
| F | -1.06329800 | 0.00000000  | -1.01615700 |
| F | 1.06329800  | 0.00000000  | -1.01615700 |
| O | 0.00000000  | 0.00000000  | 0.93310200  |
| C | 0.00000000  | 0.00000000  | -0.25115000 |

F<sub>2</sub>SiO-2IM-DTB

|    |             |             |             |
|----|-------------|-------------|-------------|
| C  | 0.00000000  | 2.72250800  | 1.06316400  |
| C  | 0.00000000  | 2.85010700  | -1.11069900 |
| C  | 0.00000000  | 4.13966900  | -0.64105900 |
| N  | 0.00000000  | 4.03127500  | 0.72864000  |
| H  | 0.00000000  | 4.79469000  | 1.38393200  |
| H  | 0.00000000  | 2.29347700  | 2.05093500  |
| H  | 0.00000000  | 2.48832300  | -2.12283600 |
| H  | 0.00000000  | 5.08882400  | -1.14498900 |
| C  | 0.00000000  | -2.72250800 | 1.06316400  |
| C  | 0.00000000  | -2.85010700 | -1.11069900 |
| C  | 0.00000000  | -4.13966900 | -0.64105900 |
| N  | 0.00000000  | -4.03127500 | 0.72864000  |
| H  | 0.00000000  | -4.79469000 | 1.38393200  |
| H  | 0.00000000  | -2.29347700 | 2.05093500  |
| H  | 0.00000000  | -2.48832300 | -2.12283600 |
| H  | 0.00000000  | -5.08882400 | -1.14498900 |
| N  | 0.00000000  | -1.99269300 | -0.04160800 |
| N  | 0.00000000  | 1.99269300  | -0.04160800 |
| F  | -1.29662700 | 0.00000000  | -0.90444500 |
| F  | 1.29662700  | 0.00000000  | -0.90444500 |
| O  | 0.00000000  | 0.00000000  | 1.66030400  |
| Si | 0.00000000  | 0.00000000  | 0.09344200  |

F<sub>2</sub>CO-2IM-TB-HB-1

|   |             |            |             |
|---|-------------|------------|-------------|
| C | -0.74124100 | 0.03385300 | 0.04664000  |
| C | -1.56533000 | 2.00695800 | -0.13328000 |
| C | -0.19406200 | 2.15363100 | -0.12117400 |

|   |             |             |             |
|---|-------------|-------------|-------------|
| N | 0.31119700  | 0.88680100  | -0.00580500 |
| H | 1.30418500  | 0.62136000  | 0.02834000  |
| H | -0.63263300 | -1.03391600 | 0.13928000  |
| H | -2.31657100 | 2.77444700  | -0.21047900 |
| H | 0.43998800  | 3.02045500  | -0.18222400 |
| N | -1.89859800 | 0.68054500  | -0.02834500 |
| F | -4.28483700 | -0.45317500 | -1.05853000 |
| F | -4.32341100 | -0.30674700 | 1.06469400  |
| O | -3.11619800 | -1.92616200 | 0.13130100  |
| C | -3.78751500 | -0.95683100 | 0.05242900  |
| C | 5.15016500  | -0.57923600 | 0.68311200  |
| C | 3.95385500  | -0.04450600 | 1.10073000  |
| C | 3.74475000  | -0.40290800 | -1.01102200 |
| N | 4.99507100  | -0.79910800 | -0.66143600 |
| H | 5.68504100  | -1.18850100 | -1.28258600 |
| H | 6.06089500  | -0.81392500 | 1.20369700  |
| H | 3.67371400  | 0.26356300  | 2.09303300  |
| H | 3.36609000  | -0.47082100 | -2.01652700 |
| N | 3.08652900  | 0.06178500  | 0.04086800  |

F<sub>2</sub>CO-2IM-TB-HB-2

|   |             |             |             |
|---|-------------|-------------|-------------|
| C | 3.66354700  | -0.34271900 | -1.01368700 |
| C | 3.76960300  | 0.14943600  | 1.08233300  |
| C | 5.02152400  | -0.29376700 | 0.72730700  |
| N | 4.93047200  | -0.59993600 | -0.60579300 |
| H | 5.67294700  | -0.95807700 | -1.18428900 |
| H | 3.32540600  | -0.50126200 | -2.02332600 |
| H | 3.43018800  | 0.48268200  | 2.04759100  |
| H | 5.93214000  | -0.41448400 | 1.28548200  |
| C | -0.76062300 | -0.32667800 | 0.05157900  |
| C | -1.81711500 | 1.58166600  | -0.17344200 |
| C | -0.46795800 | 1.84323700  | -0.19732700 |
| N | 0.16859100  | 0.63726800  | -0.05512700 |
| H | 1.19638100  | 0.47495100  | -0.03773000 |
| H | -0.59802200 | -1.38266700 | 0.17501300  |
| H | -2.66810400 | 2.23292500  | -0.25251000 |
| H | 0.07204900  | 2.76684500  | -0.30155300 |
| N | -1.96065200 | 0.23288800  | -0.01877300 |
| N | 2.93246100  | 0.11608900  | -0.00683100 |
| F | -3.95239800 | -0.23709100 | -1.07698900 |
| F | -3.96663000 | 0.00306400  | 1.09191800  |
| O | -3.03768200 | -1.85951100 | 0.20664300  |
| C | -3.29004100 | -0.68163200 | 0.07481900  |



F<sub>2</sub>SiO-2IM-TB-HB

|    |             |             |             |
|----|-------------|-------------|-------------|
| C  | 3.84938800  | -0.52486500 | -0.95102100 |
| C  | 4.12893600  | 0.30522300  | 1.01933900  |
| C  | 5.31205700  | -0.31213000 | 0.68985200  |
| N  | 5.11122700  | -0.83069100 | -0.56299800 |
| H  | 5.78093200  | -1.35473100 | -1.10264100 |
| H  | 3.43562300  | -0.82061300 | -1.89984200 |
| H  | 3.88119500  | 0.82874100  | 1.92618300  |
| H  | 6.24138100  | -0.42462200 | 1.21806300  |
| C  | -0.43487000 | -0.14639100 | 0.06199200  |
| C  | -1.46783600 | 1.75818600  | -0.25026000 |
| C  | -0.11836700 | 2.00588400  | -0.27416700 |
| N  | 0.50289900  | 0.79945700  | -0.07632900 |
| H  | 1.53058800  | 0.61764100  | -0.04526300 |
| H  | -0.28188900 | -1.19911700 | 0.22981500  |
| H  | -2.30242200 | 2.42577300  | -0.36561100 |
| H  | 0.43119400  | 2.91891000  | -0.41317900 |
| N  | -1.64257600 | 0.41336800  | -0.04055800 |
| N  | 3.22603400  | 0.16850800  | -0.00739300 |
| F  | -3.92043100 | -0.14984200 | -1.24433800 |
| F  | -3.95088300 | 0.19353900  | 1.22326700  |
| O  | -2.69251100 | -2.09454400 | 0.29927700  |
| Si | -3.16668800 | -0.64277400 | 0.09174600  |

F<sub>2</sub>CO-2IM-HB-TB- $\pi$ -1

|   |             |             |             |
|---|-------------|-------------|-------------|
| C | 0.10431100  | 0.97946500  | -1.14708500 |
| C | -0.64465500 | 2.12959700  | 0.50563500  |
| C | 0.66820000  | 2.51064600  | 0.33323800  |
| N | 1.11969700  | 1.77466200  | -0.72864300 |
| H | 2.08085300  | 1.69749300  | -1.02589300 |
| H | 0.21012100  | 0.28035300  | -1.95853500 |
| H | -1.35057100 | 2.48943700  | 1.23482600  |
| H | 1.29564700  | 3.21128400  | 0.85448200  |
| C | 2.05561600  | -0.36754000 | 1.16054900  |
| C | 2.91021300  | -1.19462100 | -0.62187700 |
| C | 1.67805100  | -1.79740400 | -0.46880500 |
| N | 1.15457200  | -1.25962700 | 0.67503700  |
| H | 0.21556400  | -1.41076200 | 1.02293900  |
| H | 1.87375500  | 0.20763900  | 2.05247500  |
| H | 3.63966700  | -1.36830400 | -1.39520600 |
| H | 1.15316500  | -2.53755400 | -1.04689800 |
| N | 3.13940400  | -0.30138500 | 0.39663300  |
| N | -0.98840800 | 1.17511300  | -0.42017100 |
| C | -2.42303200 | -0.80937400 | 0.16746000  |

|   |             |             |             |
|---|-------------|-------------|-------------|
| O | -1.78329800 | -1.18863600 | 1.09114400  |
| F | -3.48493600 | -0.05033600 | 0.23809800  |
| F | -2.28405300 | -1.22593700 | -1.07165500 |

F<sub>2</sub>CO-2IM-HB-TB- $\pi$ -2

|   |             |             |             |
|---|-------------|-------------|-------------|
| C | -0.05590200 | 0.76837500  | -1.04317100 |
| C | -1.16294200 | 1.70202500  | 0.60934000  |
| C | -0.17110500 | 2.57354700  | 0.23387300  |
| N | 0.49472900  | 1.96848500  | -0.79834000 |
| H | 1.36295500  | 2.28023000  | -1.20776700 |
| H | 0.29672900  | 0.04583300  | -1.75563400 |
| H | -1.91228100 | 1.77107800  | 1.37709700  |
| H | 0.10323900  | 3.54222200  | 0.60897700  |
| C | 1.89243900  | 0.00028700  | 1.12301900  |
| C | 2.94218000  | -0.71598900 | -0.60018900 |
| C | 1.94057200  | -1.63327300 | -0.34190900 |
| N | 1.29241100  | -1.16374000 | 0.76625900  |
| H | 0.37327400  | -1.47531600 | 1.10533700  |
| H | 1.56234100  | 0.58059400  | 1.96901100  |
| H | 3.68767900  | -0.75076100 | -1.37733300 |
| H | 1.64634300  | -2.54559200 | -0.83091900 |
| N | 2.90520200  | 0.30710800  | 0.31609600  |
| N | -1.06965200 | 0.60540100  | -0.20109800 |
| F | -1.56471500 | -1.44146300 | -1.10885400 |
| F | -3.13682300 | -0.38758900 | -0.00467500 |
| O | -1.44518000 | -1.31073200 | 1.13615100  |
| C | -1.81921200 | -0.78192800 | 0.09626600  |

F<sub>2</sub>SiO-2IM-HB-TB- $\pi$

|   |             |             |             |
|---|-------------|-------------|-------------|
| C | -0.29905200 | 0.88385300  | 0.69706900  |
| C | 1.29675300  | 1.99994900  | -0.31316300 |
| C | 0.25232800  | 2.86503700  | -0.11635400 |
| N | -0.71951900 | 2.14170400  | 0.52508800  |
| H | -1.67424700 | 2.42402000  | 0.70046800  |
| H | -0.88760700 | 0.09783900  | 1.14580200  |
| H | 2.25208700  | 2.15307700  | -0.78064800 |
| H | 0.12885800  | 3.89983800  | -0.37688900 |
| C | -2.14062300 | -0.22921500 | -1.14706500 |
| C | -3.34817500 | -0.45015400 | 0.60620000  |
| C | -2.48272900 | -1.53077900 | 0.57765600  |
| N | -1.73504500 | -1.38077200 | -0.55630200 |
| H | -0.79072300 | -1.81344100 | -0.70391000 |
| H | -1.69505400 | 0.13720100  | -2.05790700 |
| H | -4.11842300 | -0.23516600 | 1.32873000  |

|    |             |             |             |
|----|-------------|-------------|-------------|
| H  | -2.34847900 | -2.36739400 | 1.24146400  |
| N  | -3.12739200 | 0.36697600  | -0.47484700 |
| N  | 0.93488100  | 0.77290400  | 0.19935700  |
| F  | 2.54340000  | -0.98057600 | 1.41045800  |
| F  | 2.98875100  | -0.30450100 | -0.97653000 |
| O  | 0.83188300  | -1.93248900 | -0.48731200 |
| Si | 1.82483500  | -0.84344300 | -0.01307800 |
